# Supplementary material for: Codon Usage Domains over Bacterial Chromosomes
Source: PLoS Comput Biol. 2006 Apr 21;2(4):e37. doi: 10.1371/journal.pcbi.0020037 (PMC1447655; doi:10.1371/journal.pcbi.0020037)
Supplement: Table S1 — (3 KB TEX) [file pcbi.0020037.st001.tex]

\documentclass[12pt,draft]{article}
\usepackage{multicol}

\topmargin=1cm
\textwidth=16.0cm
\textheight=20cm
\evensidemargin=0.2cm
\oddsidemargin=0.2cm

\begin{document}

\vspace*{-2.cm}

\begin{multicols}{2}

%\begin{table}[!h]
\begin{tabular}{|c||r|r|r|r|}
\hline
Ala & 1 & 2 & 3 & 4 \\ 
\hline
GCA &  .239 &  .308 &  .176 &  .210 \\ 
GCC &  .179 &  .226 &  .291 &  .287 \\ 
GCG &  .327 &  .228 &  .406 &  .358 \\ 
GCT &  .255 &  .237 &  .127 &  .145 \\ 
\hline
Arg & & &  & \\
\hline
AGA &  .006 &  .155 &  .012 &  .034 \\ 
AGG &  .003 &  .076 &  .007 &  .023 \\ 
CGA &  .009 &  .129 &  .033 &  .081 \\ 
CGC &  .347 &  .227 &  .468 &  .405 \\ 
CGG &  .005 &  .120 &  .067 &  .133 \\ 
CGT &  .629 &  .293 &  .414 &  .324 \\ 
\hline
Asn & & &  & \\
\hline
AAC &  .800 &  .357 &  .653 &  .484 \\ 
AAT &  .200 &  .643 &  .347 &  .515 \\ 
\hline
Asp & & &  & \\
\hline
GAC &  .514 &  .278 &  .405 &  .336 \\ 
GAT &  .486 &  .722 &  .595 &  .664 \\ 
\hline
Cys & & &  & \\
\hline
TGC &  .612 &  .443 &  .617 &  .544 \\ 
TGT &  .388 &  .557 &  .383 &  .456 \\ 
\hline
Gln & & &  & \\
\hline
CAA &  .197 &  .470 &  .294 &  .377 \\ 
CAG &  .803 &  .530 &  .706 &  .623 \\ 
\hline
Glu & & &  & \\
\hline
GAA &  .764 &  .690 &  .686 &  .669 \\ 
GAG &  .236 &  .310 &  .314 &  .331 \\ 
\hline
Gly & & &  & \\
\hline
GGA &  .026 &  .215 &  .070 &  .134 \\ 
GGC &  .428 &  .264 &  .456 &  .392 \\ 
GGG &  .048 &  .176 &  .144 &  .177 \\ 
GGT &  .498 &  .345 &  .330 &  .297 \\ 
\hline
His & & &  & \\
\hline
CAC &  .677 &  .317 &  .487 &  .376 \\ 
CAT &  .323 &  .683 &  .513 &  .624 \\ 
\hline
Ile & & &  & \\
\hline
ATA &  .006 &  .215 &  .026 &  .076 \\ 
ATC &  .628 &  .272 &  .472 &  .381 \\ 
ATT &  .366 &  .513 &  .502 &  .542 \\ 
\hline
\end{tabular}
 

%\end{table}
%\end{center}

\begin{center}
\begin{tabular}{|c||r|r|r|r|}

\hline
Leu & 1 & 2 & 3 & 4 \\ 
\hline
CTA &  .041 &  .253 &  .083 &  .148 \\ 
CTC &  .058 &  .153 &  .110 &  .146 \\ 
CTG &  .010 &  .066 &  .025 &  .042 \\ 
CTT &  .082 &  .098 &  .110 &  .106 \\ 
TTA &  .749 &  .257 &  .590 &  .449 \\ 
TTG &  .060 &  .173 &  .082 &  .108 \\ 
\hline
Lys & & &  & \\
\hline
AAA &  .792 &  .741 &  .775 &  .757 \\ 
AAG &  .208 &  .259 &  .225 &  .243 \\ 
\hline
Phe & & &  & \\
\hline
TTC &  .680 &  .312 &  .495 &  .352 \\ 
TTT &  .320 &  .688 &  .505 &  .648 \\ 
\hline
Pro & & &  & \\
\hline
CCA &  .159 &  .280 &  .167 &  .192 \\ 
CCC &  .017 &  .172 &  .086 &  .162 \\ 
CCG &  .715 &  .265 &  .631 &  .477 \\ 
CCT &  .108 &  .284 &  .116 &  .168 \\ 
\hline
Ser & & &  & \\
\hline
AGC &  .268 &  .184 &  .305 &  .291 \\ 
AGT &  .055 &  .206 &  .113 &  .178 \\ 
TCA &  .061 &  .213 &  .096 &  .125 \\ 
TCC &  .244 &  .111 &  .170 &  .128 \\ 
TCG &  .075 &  .114 &  .184 &  .163 \\ 
TCT &  .296 &  .172 &  .131 &  .116 \\ 
\hline
Thr & & &  & \\
\hline
ACA &  .051 &  .276 &  .080 &  .143 \\ 
ACC &  .538 &  .271 &  .509 &  .407 \\ 
ACG &  .142 &  .233 &  .269 &  .308 \\ 
ACT &  .268 &  .220 &  .142 &  .143 \\ 
\hline
Tyr & & &  & \\
\hline
TAC &  .612 &  .304 &  .490 &  .386 \\ 
TAT &  .389 &  .696 &  .510 &  .614 \\ 
\hline
Val & & &  & \\
\hline
GTA &  .192 &  .207 &  .134 &  .147 \\ 
GTC &  .143 &  .215 &  .217 &  .236 \\ 
GTG &  .288 &  .217 &  .434 &  .379 \\ 
GTT &  .377 &  .361 &  .214 &  .237 \\ 
\hline

\end{tabular}

\end{center}

\end{multicols}

Table S1: The average posterior probabilities of usage of the
synonymous codons for the four clusters that we identified in
\emph{E. coli} K12.

\end{document}
