# Supplementary material for: Codon Usage Domains over Bacterial Chromosomes
Source: PLoS Comput Biol. 2006 Apr 21;2(4):e37. doi: 10.1371/journal.pcbi.0020037 (PMC1447655; doi:10.1371/journal.pcbi.0020037)
Supplement: Table S2 — (3 KB TEX) [file pcbi.0020037.st002.tex]

\documentclass[12pt,draft]{article}
\usepackage{multicol}

\topmargin=1cm
\textwidth=17.0cm
\textheight=20cm
\evensidemargin=0.2cm
\oddsidemargin=0.2cm

\begin{document}
\vspace*{-2.cm}

\begin{multicols}{2}
\begin{center}
%\begin{table}[!h]
\begin{tabular}{|c||r|r|r|r|r|}

\hline
Ala & 1 & 2 & 3 & 4 & 5 \\
\hline
GCA & .321 & .380 & .293 & .236 & .298 \\
GCC & .080 & .133 & .195 & .246 & .207 \\
GCG & .233 & .111 & .277 & .317 & .236 \\
GCT & .366 & .376 & .235 & .201 & .259 \\
\hline
Arg & & & & &  \\
\hline
AGA & .118 & .408 & .263 & .222 & .281 \\
AGG & .003 & .136 & .028 & .108 & .118 \\
CGA & .024 & .142 & .077 & .093 & .116 \\
CGC & .356 & .075 & .282 & .228 & .157 \\
CGG & .007 & .075 & .101 & .209 & .171 \\
CGT & .493 & .164 & .249 & .140 & .156 \\
\hline
Asn & & & & & \\
\hline
AAC & .710 & .313 & .523 & .451 & .380 \\
AAT & .290 & .687 & .477 & .549 & .620 \\
\hline
Asp & & & & &  \\
\hline
GAC & .446 & .247 & .398 & .385 & .337 \\
GAT & .554 & .753 & .602 & .615 & .663 \\
\hline
Cys & & & & & \\
\hline 
TGC & .562 & .346 & .587 & .616 & .521 \\
TGT & .438 & .654 & .413 & .384 & .479 \\
\hline
Gln & & & & & \\
\hline 
CAA & .706 & .706 & .516 & .433 & .518 \\
CAG & .294 & .294 & .484 & .567 & .482 \\
\hline
Glu & & & & &  \\
\hline
GAA & .773 & .716 & .726 & .629 & .677 \\
GAG & .227 & .284 & .274 & .371 & .323 \\
\hline
Gly & & & & &  \\
\hline
GGA & .293 & .367 & .309 & .288 & .335 \\
GGC & .339 & .173 & .386 & .388 & .298 \\
GGG & .043 & .163 & .115 & .186 & .186 \\
GGT & .325 & .298 & .189 & .137 & .181 \\
\hline
His & & & & &  \\
\hline
CAC & .549 & .251 & .389 & .334 & .287 \\
CAT & .451 & .749 & .611 & .666 & .713 \\
\hline
Ile & & & & &  \\
\hline
ATA & .016 & .267 & .056 & .097 & .169 \\
ATC & .548 & .204 & .408 & .413 & .330 \\
ATT & .436 & .529 & .536 & .490 & .500 \\
\hline
\end{tabular}

%\end{table}
\end{center}

%\begin{center}

\begin{tabular}{|c||r|r|r|r|r|}
\hline
Leu & 1 & 2 & 3 & 4 & 5 \\
\hline
TTA & .209 & .377 & .198 & .142 & .208 \\
TTG & .107 & .163 & .133 & .152 & .172 \\
CTA & .054 & .112 & .044 & .037 & .053 \\
CTC & .060 & .061 & .114 & .141 & .103 \\
CTG & .139 & .082 & .232 & .303 & .235 \\
CTT & .431 & .205 & .277 & .225 & .229 \\
\hline
Lys & & & & &  \\
\hline
AAA & .832 & .717 & .749 & .664 & .684 \\
AAG & .168 & .283 & .251 & .336 & .316 \\
\hline
Phe & & & & &  \\
\hline
TTC & .628 & .245 & .436 & .305 & .260 \\
TTT & .372 & .755 & .564 & .695 & .740 \\
\hline
Pro & & & & & \\
\hline 
CCA & .273 & .345 & .193 & .139 & .198 \\
CCC & .012 & .097 & .043 & .105 & .106 \\
CCG & .307 & .162 & .465 & .523 & .401 \\
CCT & .409 & .395 & .300 & .233 & .294 \\
\hline
Ser & & & & & \\
\hline 
AGC & .202 & .132 & .243 & .257 & .217 \\
AGT & .078 & .207 & .083 & .082 & .112 \\
TCA & .229 & .263 & .258 & .213 & .238 \\
TCC & .075 & .087 & .129 & .154 & .120 \\
TCG & .017 & .069 & .071 & .127 & .109 \\
TCT & .399 & .243 & .215 & .167 & .204 \\
\hline
Thr & & & & & \\
\hline 
ACA & .502 & .427 & .455 & .369 & .410 \\
ACC & .036 & .122 & .128 & .196 & .167 \\
ACG & .151 & .120 & .264 & .333 & .263 \\
ACT & .310 & .331 & .153 & .101 & .159 \\
\hline
Tyr & & & & & \\
\hline 
TAC & .604 & .276 & .411 & .358 & .303 \\
TAT & .396 & .724 & .589 & .642 & .697 \\
\hline
Val & & & & &  \\
\hline
GTA & .303 & .299 & .211 & .144 & .202 \\
GTC & .142 & .124 & .273 & .318 & .241 \\
GTG & .142 & .156 & .236 & .310 & .266 \\
GTT & .413 & .420 & .281 & .228 & .291 \\
\hline
\end{tabular}

%\end{center}
\end{multicols}


Table S2: The average posterior probabilities of usage of the
synonymous codons for the five clusters that we identified in
\emph{B. subtilis}.
\end{document}
